# Supplementary material for: The opioid peptide dynorphin A induces leukocyte responses via integrin Mac-1 (αMβ2, CD11b/CD18)
Source: PubMed Central journal article supplement (PMC4481117; doi:10.1186/s12990-015-0027-0), 2015-06-03
Supplement: 12990_2015_27_MOESM1_ESM.pdf [file 12990_2015_27_MOESM1_ESM.pdf]

THE OPIOID PEPTIDE DYNORPHIN A INDUCES LEUKOCYTE RESPONSES  
VIA INTEGRIN Mac-1 ( $\alpha_M\beta_2$ , CD11b/CD18)

Nataly P. Podolnikova, Julie A. Brothwell and Tatiana P. Ugarova

| Wild Type | Peptide   | Signal    | Peptide   | Signal   | Peptide  | Signal | Peptide | Signal | Peptide   | Signal | Peptide   | Signal | Peptide   | Signal | Peptide   | Signal |           |    |
|-----------|-----------|-----------|-----------|----------|----------|--------|---------|--------|-----------|--------|-----------|--------|-----------|--------|-----------|--------|-----------|----|
| Mutants   | YGGFLRRIR | 4         | FLRRIRPLK | 4        | RIRPKLKW | 4      | PKLKW   | 4      | KW        | 4      | NQ        | 3      | RYGGFLRRQ | 4      | GFLRRQFKV | 3      | RRQFKVVGG | 1  |
|           | YGGFLDRIR | 1         | FLDRIRPLK | 3        | DIRPKLKW | 3      | PELKW   | NB     | EWDNQKRYG | 3      | NQERYGGFL | NB     | DYGGFLRRQ | 3      | GFLDRQFKV | 3      | DRQFKVVGG | 2  |
|           | YGGFLRRID | 2         | FLRRIDPLK | 2        | RIDPKLKW | 2      | PKLEW   | NB     | KW        | NB     | NQDYGGFL  | NB     | RYGGFLDRQ | 2      | GFLDRQFKV | 2      | RDQFKVVGG | 1  |
|           | YGGFLDDIR | NB        | FLDRIRPLE | NB       | DIRPELKW | NB     | PELEW   | NB     | EWDNQERYG | NB     | NQEDYGGFL | NB     | RYGGFLRDQ | 1      | GFLDDQFKV | NB     | DDQFKVVGG | NB |
|           | YGGFLRDID | NB        | FLRRIDPLE | NB       | RIDPELKW | NB     | PKLEW   | NB     | EWDNQKDYG | NB     |           |        | DYGGFLDRQ | NB     | GFLDRQFEV | NB     | DRQFEVGG  | NB |
|           | YGGFLDRID | NB        | FLRRIDPLE | NB       | DIDPELKW | NB     | PKLEW   | NB     | KW        | NB     |           |        | RYGGFLDDQ | NB     | GFLDRQFEV | NB     | RDQFEVGG  | NB |
|           | YGGFLDDID | NB        | FLDDIDPLE | NB       | DIDPELKW | NB     | PELKW   | NB     | EWDNQERYG | NB     |           |        | DYGGFLRDQ | NB     | GFLDDQFEV | NB     | DDQFEVGG  | NB |
|           |           |           | FLDDIDPLE | 1        | DIRPKLEW | NB     | PELEW   | NB     | KW        | NB     |           |        | DYGGFLDDQ | NB     | GFLRRQFEV | 1      | RRQFEVGG  | 1  |
|           |           |           | FLDRIDPLK | 1        | RIDPKLEW | NB     |         |        |           |        |           |        |           |        |           |        |           |    |
|           |           |           | FLRDIDPLK | 1        | DIDPKLEW | NB     |         |        |           |        |           |        |           |        |           |        |           |    |
|           |           |           | FLDDIRPLE | NB       | RIRPELW  | NB     |         |        |           |        |           |        |           |        |           |        |           |    |
|           |           |           | FLDRIDPLE | NB       | DIDPELW  | NB     |         |        |           |        |           |        |           |        |           |        |           |    |
|           |           |           | FLRDIDPLE | NB       | DIRPELW  | NB     |         |        |           |        |           |        |           |        |           |        |           |    |
|           |           |           | FLDDIDPLK | NB       | RIDPELW  | NB     |         |        |           |        |           |        |           |        |           |        |           |    |
|           |           | FLDDIDPLE | NB        | RIRPKLEW | NB       |        |         |        |           |        |           |        |           |        |           |        |           |    |
|           |           | FLRRIRPLE | 2         | RIRPELKW | 1        |        |         |        |           |        |           |        |           |        |           |        |           |    |

**Figure S1. Identification of residues in dynorphin A critical for  $\alpha_M$  I-domain binding.** The dynorphin AB-based substitutional peptide libraries with single, double or triple mutations of basic residues were prepared by SPOT synthesis as described in Experimental Procedures. Mutated amino acid residues are shown in red. The membranes with synthesized peptide libraries were incubated with  $^{125}$ I-labeled  $\alpha_M$  I domain and subjected to autoradiography. The  $\alpha_M$  I-domain binding was analyzed by densitometry and expressed in arbitrary units with the strongest binding to wild-type peptides assigning a value of 4+. The peptides that partially lost their ability to bind the  $\alpha_M$  I-domain were grouped according to their activity and marked as 3+, 2+ and +. The peptides that lost their ability to bind the  $\alpha_M$  I-domain are marked with “NB”.
